# Supplementary material for: Augmenting adhesion strength and biomimetic properties of polymeric nanocomposite coatings on titanium implants
Source: Research Square preprint supplement (doi:10.21203/rs.3.rs-7829417/v1), 2025-11-19
Supplement: Supplementary file 1 [file 4a09701f7d0c8c02dd58e7b3.docx]

**Supporting information**

**Cartesian coordinates of hydroxyapatite optimized by B3LYP**

8       -2.546215000     -0.785913000      2.729006000

8       -2.366653000      0.531987000     -0.249237000

15      -2.676105000     -0.746294000     -1.242669000

8       -4.225867000     -0.834945000     -1.299646000

8       -2.197891000     -1.890539000     -0.241010000

8       -1.840140000     -0.486960000     -2.501708000

8        1.457100000     -0.218344000     -1.498873000

15       2.075767000     -1.344917000     -0.665310000

8        1.224886000     -1.834502000      0.615221000

8        2.598589000     -2.662215000     -1.299451000

8        3.392661000     -0.747505000      0.102517000

8        0.414253000      1.318247000      0.781213000

15       0.662976000      2.954125000      0.639075000

8        0.959330000      2.924061000     -0.976816000

8        2.083947000      3.135658000      1.270005000

8       -0.518314000      3.768857000      1.060172000

20       2.729532000      1.492976000     -0.195597000

20      -4.014228000     -0.716533000      1.032222000

20       3.272532000     -2.969491000      0.883585000

20      -0.738088000     -0.602968000      1.217650000

20      -0.544123000      1.282187000     -1.563441000

1       -2.537541000     -0.410247000      3.614066000
